# Supplementary material
Source: ML conference proceedings conference paper supplement (https://openreview.net/forum?id=6h8RjNchuh)
Supplement: supplementary_material [file attachment]

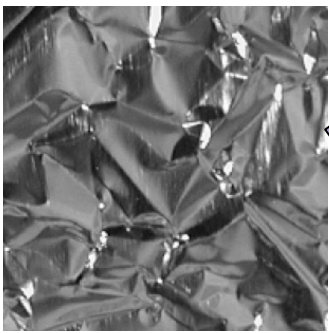

Original Image

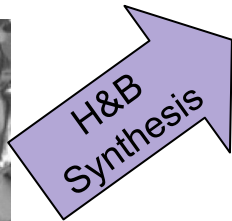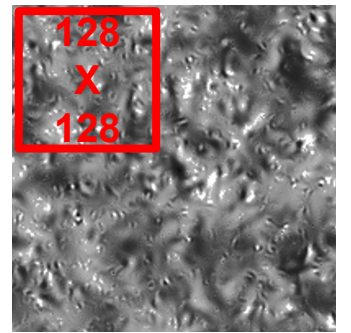

Depleted Image Crop

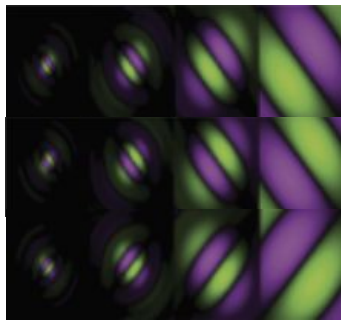

Pyramid Filters

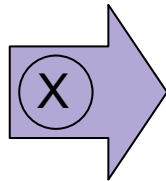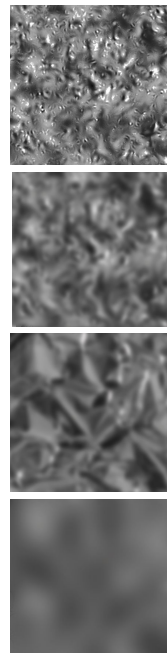

Pyramid Images

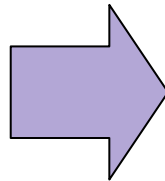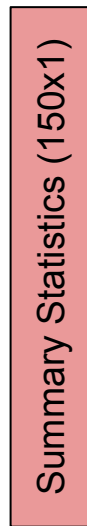

Summary  
Statistics  
Vector

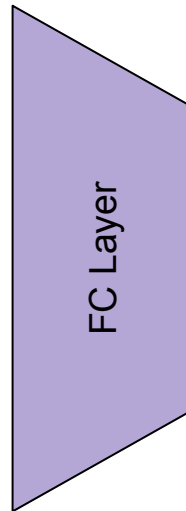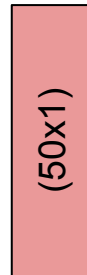

Reduced  
Representation
